# Supplementary material
Source: PubMed Central journal article supplement (PMC1964815)
Supplement: pnas_0706695104_4.pdf [file pnas_0706695104_4.pdf]

**Table 4. Characteristics of the ORFs of *cdtI*-phage genome and results of BLAST search showing reported homology of the ORFs with that of other phages or bacteria.**

| ORF no. | Gene coordinates and orientation | Gene product Size (aa) | GC%   | Possible function             | Related phage and bacterial proteins                                                                        |                       |                            | Source          |
|---------|----------------------------------|------------------------|-------|-------------------------------|-------------------------------------------------------------------------------------------------------------|-----------------------|----------------------------|-----------------|
|         |                                  |                        |       |                               | Products (size and origin)                                                                                  | GenBank accession no. | BLAST e-value (identity) % |                 |
| 1       | 185→724                          | 179                    | 51.11 | Small terminase subunit       | Hypothetical protein EcolB_01000955 (179 aa; <i>E. coli</i> B171 [EPEC O111:NM])                            | ZP 00712009           | 4.80E-97 (179/179) 100%    | DS <sup>a</sup> |
| 2       | 733→2832                         | 699                    | 54.43 | Large terminase subunit (GpA) | Bacteriophage tail assembly protein (677 aa; <i>E. coli</i> B171 [EPEC O111:NM])                            | ZP 00712010           | 0 (675/677) 99.7%          | DS              |
| 3       | 2829→3041                        | 70                     | 54.79 | Hypothetical protein          | Hypothetical protein EcolB_01004539 (70 aa; <i>E. coli</i> B171 [EPEC O111:NM])                             | ZP 00708566           | 3.30E-33 (70/70) 100.0%    | DS              |
| 4       | 3041→4549                        | 502                    | 54.67 | Portal protein                | Bacteriophage capsid protein (526 aa; <i>E. coli</i> UTI89 [uropathogenic strains])                         | YP 544050             | 0 (502/502) 100.0%         | 1               |
| 5       | 4563→6521                        | 652                    | 51.56 | Protease/scaffold protein     | Putative protease/scaffold protein (707 aa; <i>E. coli</i> UTI89 [uropathogenic strains])                   | YP 544051             | 0 (650/652) 99.7%          | 1               |
| 6       | 6608→6931                        | 107                    | 51.23 | Unknown                       | Hypothetical protein ECs0830 (122 aa; <i>E. coli</i> str. Sakai [O157:H7])                                  | NP 308857             | 6.40E-53 (106/107) 99.1%   | 2, 3            |
| 7       | 6924→7184                        | 86                     | 54.41 | Unknown                       | ABC-type multidrug transport system (91 aa; <i>E. coli</i> B171 [EPEC O111:NM])                             | ZP 00712015           | 7.60E-38 (79/81) 97.5%     | DS              |
| 8       | 7210→7788                        | 192                    | 55.44 | DNA packaging, phage assembly | Hypothetical protein (192 aa; <i>E. coli</i> B171 [EPEC O111:NM])                                           | ZP 00712016           | 2.40E-103 (192/192) 100%   | DS              |
| 9       | 7773→8186                        | 137                    | 53.38 | DNA packaging, phage assembly | Hypothetical protein EcolE1_01000052 (137 aa; <i>E. coli</i> E110019 [atypical EPEC O111:H9])               | ZP 00723766           | 1.00E-74 (136/137) 99.3%   | DS              |
| 10      | 8197→8940                        | 247                    | 55.24 | Cell motility and secretion   | Bacterial surface proteins containing Ig-like domains (247 aa; <i>E. coli</i> B171 [EPEC O111:NM])          | ZP 00712018           | 9.70E-137 (245/247) 99.2%  | DS              |
| 11      | 8998→9387                        | 129                    | 52.82 | Structural component          | Putative tail component of prophage CP-933K (129 aa; <i>E. coli</i> UTI89 [uropathogenic strains])          | YP 544057             | 2.90E-66 (127/129) 98.4%   | 1               |
| 12      | 9396→9725                        | 109                    | 56.06 | Minor tail protein            | Putative minor tail protein (Bacteriophage lambda GpT) (109 aa; <i>E. coli</i> str. Sakai [O157:H7])        | NP 308863             | 1.90E-57 (109/109) 100%    | 2, 3            |
| 13      | 9697→12753                       | 1018                   | 53.42 | Tail protein                  | Putative tail length tape measure protein precursor (1018 aa; <i>E. coli</i> UTI89 [uropathogenic strains]) | YP 544059             | 0 (1013/1018) 99.5%        | 1               |

|    |             |      |       |                                       |                                                                                                      |             |                               |      |
|----|-------------|------|-------|---------------------------------------|------------------------------------------------------------------------------------------------------|-------------|-------------------------------|------|
| 14 | 12753→13082 | 109  | 52.24 | Tail tip assembly                     | putative minor tail protein (Bacteriophage lambda GpM) (109 aa; <i>E. coli</i> str. Sakai [O157:H7]) | NP 308865   | 7.00E-60<br>(109/109) 100%    | 2, 3 |
| 15 | 13092→13790 | 232  | 55.36 | Tail tip assembly                     | Phage minor tail protein L (232 aa; <i>E. coli</i> B7A [ETEC O148:H28])                              | ZP 00714017 | 4.70E-135<br>(232/232) 100%   | DS   |
| 16 | 13819→14538 | 239  | 59.58 | Tail tip assembly                     | Putative tail fiber component K of prophage (261aa; <i>E. coli</i> UTI89 [uropathogenic strains])    | YP 544062   | 7.60E-144<br>(234/239) 97.9%  | 1    |
| 17 | 14436→15083 | 215  | 59.41 | Tail tip assembly                     | Putative tail component of prophage CP-933K (215 aa; <i>E. coli</i> UTI89 [uropathogenic strains])   | YP 544063   | 1.40E-111<br>(203/215) 94.4%  | 1    |
| 18 | 15144→18641 | 1165 | 55.95 | Tail tip assembly, central tail fiber | Putative host specificity protein (1165 aa; <i>Shigella sonnei</i> Ss046)                            | YP 311288   | 0<br>(1136/1165) 97.5%        | 4    |
| 19 | 18711→19310 | 199  | 55.5  | Lom protein                           | Outer membrane receptor proteins (Lom protein) (199 aa; <i>E. coli</i> B171 [EPEC O111:NM])          | ZP 00712028 | 3.10E-112<br>(196/199) 98.5%  | DS   |
| 20 | 19525→20688 | 387  | 59.71 | Tail fiber protein                    | Putative tail fiber protein (437aa; <i>E. coli</i> str. Sakai [O157:H7])                             | NP 310968   | 0<br>(370/387) 95.6%          | 2, 3 |
| 21 | 20651→20959 | 102  | 48.54 | Unknown                               | Putative tail fiber protein of bacteriophage BP-933W (102 aa; <i>E. coli</i> EDL933 [O157:H7])       | NP 286994   | 6.90E-52<br>(100/102) 98.0%   | 5    |
| 22 | 20065←20823 | 252  | 59.95 | Unknown                               | Hypothetical protein Stx2Ip026 (284 aa; Stx2 converting bacteriophage I)                             | NP 612905   | 1.90E-111<br>(196/225) 87.1%  | 6    |
| 23 | 21066→21947 | 293  | 39.46 | Unknown                               | Non-LEE-encoded type III effector H (293 aa; <i>E. coli</i> str. Sakai [O157:H7])                    | NP 286534   | 2.40E-154<br>(268/293) 91.5%  | 3, 7 |
| 24 | 22171→22998 | 275  | 40.58 |                                       | Truncated nonfunctional Cif (275 aa; <i>E. coli</i> [O26:H11])                                       | AAN07904    | 2.80E-154<br>(270/275) 98.2%  | 8    |
| 25 | 23204←23476 | 90   | 45.05 | Unknown                               | Unkown                                                                                               |             |                               |      |
| 26 | 23437←23616 | 59   | 40.00 | Unknown                               | Unkown                                                                                               |             |                               |      |
| 27 | 24250→24963 | 237  | 43.28 | CdtA                                  | CdtA (237 aa; <i>E. coli</i> [O86:H34])                                                              | AAD10621    | 1.80E-137<br>(236/237) 99.6%  | 9    |
| 28 | 24960→25781 | 273  | 42.34 | CdtB                                  | CdtB (273 aa; <i>E. coli</i> [O86:H34])                                                              | AAD10622    | 1.40E-153<br>(273/273) 100.0% | 9    |
| 29 | 25778→26350 | 190  | 42.41 | CdtC                                  | CdtC (190 aa; <i>E. coli</i> [O86:H34])                                                              | AAD10623    | 1.30E-106<br>(190/190) 100.0% | 9    |
| 30 | 26458←26706 | 82   | 36.76 |                                       | Hypothetical protein EcolB_01000978 (82 aa; <i>E. coli</i> B171 [EPEC O111:NM])                      | ZP 00712031 | 3.60E-40<br>(82/82) 100.0%    | DS   |

|    |             |     |       |                 |                                                                                                                                               |             |                               |        |    |
|----|-------------|-----|-------|-----------------|-----------------------------------------------------------------------------------------------------------------------------------------------|-------------|-------------------------------|--------|----|
| 31 | 26790→26993 | 67  | 36.76 | Unknown         | Unkown                                                                                                                                        |             |                               |        |    |
| 32 | 27218→28435 | 405 | 45.16 | Integrase       | Integrase-like protein (P4-like integrases)<br>(404 aa; <i>E. coli</i> UTI89 [uropathogenic strains])                                         | YP 544016   | 0<br>(399/404) 98.8%          | 1      |    |
| 33 | 28569→30701 | 710 | 33.99 | Unknown         | Unknown                                                                                                                                       |             |                               |        | DS |
| 34 | 30809←31003 | 64  | 41.03 | Unknown         | Unknown                                                                                                                                       |             |                               |        | DS |
| 35 | 31003←31623 | 206 | 50.56 | Unknown         | Valyl-tRNA synthetase<br>(206 aa; <i>E. coli</i> F11 [ExPEC O6:H31])                                                                          | ZP 00720184 | 4.90E-119<br>(197/206) 95.6%  |        | DS |
| 36 | 31623←31985 | 120 | 45.73 | Unknown         | Unknown (ofr29)<br>(120aa; <i>Shigella flexneri</i> bacteriophage V)                                                                          | AAL89431    | 1.70E-66<br>(116/120) 96.7%   | 10, 11 |    |
| 37 | 31976←32512 | 178 | 46.18 | Unknown         | Hypothetical protein UTI89_C5091(yfdR2)<br>(Predicted hydrolases of HD superfamily)<br>(178 aa; <i>E. coli</i> UTI89 [uropathogenic strains]) | YP 544022   | 5.00E-99<br>(175/178) 98.3%   | 1      |    |
| 38 | 32640←33464 | 274 | 45.45 | Unknown         | Unknown (orf31)<br>(274 aa; <i>Shigella flexneri</i> bacteriophage V)                                                                         | AAL89433    | 7.00E-150<br>(271/274) 98.9%  | 10, 11 |    |
| 39 | 33531←33893 | 120 | 50.96 | Unknown         | Hypothetical protein UTI89_C5093<br>(182 aa; <i>E. coli</i> UTI89 [uropathogenic strains])                                                    | YP 544024   | 2.20E-61<br>(120/120) 100.0%  | 1      |    |
| 40 | 33705→34160 | 151 | 52.19 | Unknown         | Hypothetical protein c3199<br>(227 aa; <i>E. coli</i> CFT073 [uropathogenic strains])                                                         | AAN81651    | 8.80E-63<br>(115/125) 92.0%   | 12     |    |
| 41 | 34560←35234 | 224 | 44.89 | Repressor (cI)  | Repressor (SOS-response transcriptional repressors)<br>(224 aa; <i>Shigella flexneri</i> bacteriophage V)                                     | AAL89436    | 3.20E-130<br>(223/224) 99.6%  | 10, 11 |    |
| 42 | 35325→35525 | 66  | 42.79 | Repressor (cro) | Repressor (cro)<br>(66 aa; <i>Shigella flexneri</i> bacteriophage V)                                                                          | AAL89437    | 1.40E-31<br>(66/66) 100%      | 10, 11 |    |
|    |             |     |       |                 | Hypothetical protein UTI89_C3003<br>(167 aa; <i>E. coli</i> UTI89 [uropathogenic strains])                                                    | YP 541990   | 1.40E-31<br>(66/66) 100%      | 1      |    |
| 43 | 35557→36120 | 187 | 51.77 | Unknown         | Hypothetical protein EcolB_01000938<br>(187 aa; <i>E. coli</i> B171 [EPEC O111:NM])                                                           | ZP 00711993 | 7.60E-104<br>(187/187) 100.0% |        | DS |
| 44 | 36117→37265 | 382 | 48.36 | Antirepressor   | Uncharacterized phage-encoded protein<br>(382aa; <i>E. coli</i> B171 [EPEC O111:NM])                                                          | ZP 00711994 | 0<br>(381/382) 99.7%          |        | DS |
| 45 | 37262→37486 | 74  | 50.22 | Unknown         | Hypothetical protein UTI89_C5099<br>(74 aa; <i>E. coli</i> UTI89 [uropathogenic strains])                                                     | YP 544030   | 3.40E-38<br>(74/74) 100.0%    | 1      |    |
| 46 | 37483→38367 | 294 | 49.49 | Unknown         | Putative replication protein<br>(272 aa; <i>E. coli</i> UTI89 [uropathogenic strains])                                                        | YP 544031   | 7.20E-151<br>(271/294) 92.2%  |        | DS |

|    |             |     |       |                                                    |                                                                                                          |             |                              |    |
|----|-------------|-----|-------|----------------------------------------------------|----------------------------------------------------------------------------------------------------------|-------------|------------------------------|----|
| 47 | 38417→39115 | 232 | 52.79 | Dam                                                | DNA adenine methylase<br>(217aa; <i>E. coli</i> UTI89 [uropathogenic strains])                           | YP 544033   | 1.8E-126<br>(216/217) 99.5%  | DS |
| 48 | 39112→39438 | 108 | 55.96 | LexA_DNA_bind<br>(RecA-mediated<br>autopeptidases) | SOS-response transcriptional repressors<br>(108aa; <i>E. coli</i> 101-1 [EAEC])                          | ZP 00925782 | 1.20E-54<br>(108/108) 100.0% | DS |
| 49 | 39435→39824 | 129 | 55.64 | Endodeoxy-<br>ribonuclease<br>(RusA)               | Holliday junction resolvase<br>(129aa; <i>E. coli</i> B171 [EPEC O111:NM])                               | ZP 00712000 | 9.60E-70<br>(129/129) 100%   | DS |
| 50 | 39844→40653 | 269 | 50.99 | Unknown                                            | Hypothetical protein EcolB_01000946 (KilA-N domain)<br>(269 aa; <i>E. coli</i> B171 [EPEC O111:NM])      | ZP 00712001 | 8.90E-150<br>(267/269) 99.3% | DS |
| 51 | 40733→41650 | 305 | 55.77 | Unknown                                            | Hypothetical protein YdfU<br>(331 aa; <i>E. coli</i> UTI89 [uropathogenic strains])                      | YP 544037   | 4.60E-180<br>(302/305) 99.0% | 1  |
| 52 | 41668→42030 | 120 | 57.85 | Q protein                                          | Putative phage antiterminator<br>(122 aa; <i>Salmonella typhimurium</i> LT2)                             | AAL21141    | 2.40E-52<br>(98/120) 81.7%   | 13 |
| 53 | 42054←42497 | 147 | 32.21 | Unknown                                            | Unknown                                                                                                  |             |                              |    |
| 54 | 42501←43442 | 313 | 35.35 | Unknown                                            | Unknown                                                                                                  |             |                              |    |
| 55 | 43697→43924 | 75  | 49.56 | Unknown                                            | Prophage CP-933O conserved hypothetical protein<br>(75 aa; <i>E. coli</i> UTI89 [uropathogenic strains]) | YP 544040   | 7.90E-35<br>(72/75) 96.0%    | 1  |
| 56 | 44075→45127 | 350 | 47.86 | DNA methylase                                      | DNA modification methylase<br>(350 aa; <i>E. coli</i> B171 [EPEC O111:NM])                               | ZP 00709127 | 0<br>(349/350) 99.7%         | DS |
| 57 | 45194→45409 | 71  | 46.76 | Lysis protein                                      | Predicted phage lysis protein<br>(71 aa; <i>E. coli</i> K12 DLP12 prophage)                              | AAC73655    | 8.50E-34<br>(71/71) 100.0%   | 14 |
| 58 | 45409→45906 | 165 | 50.8  | Lysin                                              | Lysozyme-like protein<br>(165aa; <i>Shigella sonnei</i> Ss046)                                           | YP 311635   | 2.40E-91<br>(162/165) 98.2%  | 4  |
| 59 | 45903→46370 | 155 | 54.49 | Lysin (Rz)                                         | Chromosome segregation ATPases<br>(155 aa; <i>E. coli</i> B171 [EPEC O111:NM])                           | ZP 00712006 | 3.60E-80<br>(154/155) 99.4%  | DS |
| 60 | 46392→46754 | 120 | 49.86 | Unknown                                            | Hypothetical protein EcolB_01000953 (KilA-N)<br>(127 aa; <i>E. coli</i> B171 [EPEC O111:NM])             | ZP 00712007 | 3.20E-65<br>(118/120) 98.3%  | DS |

<sup>a</sup>DS: Direct submission

## References

1. Chen SL, Hung C, Xu J, Reigstad CS, Magrini V, Sabo A, Blasiar D, Bieri T, Meyer RR, Ozersky P, *et al.* (2006) *Proc Natl Acad Sci USA* 103:5977-5982.
2. Yokoyama K, Makino K, Kubota Y, Watanabe M, Kimura S, Yutsudo CH, Kurokawa K, Ishii K, Hattori M, Tatsuno I, *et al.* (2000) *Gene* 258:127-39.
3. Hayashi T, Makino K, Ohnishi M, Kurokawa K, Ishii K, Yokoyama K, Han CG, Ohtsubo E, Nakayama K, Murata T, *et al.* (2001) *DNA Res* 8:11-22.
4. Yang F, Yang J, Zhang X, Chen L, Jiang Y, Yan Y, Tang X, Wang J, Xiong Z, Dong J, *et al.* (2005) *Nucleic Acids Res* 33:6445-6458.
5. Perna N. T, Plunkett G 3rd, Burland V, Mau B, Glasner JD, Rose DJ, Mayhew GF, Evans PS, Gregor J, Kirkpatrick HA, *et al.* (2001) *Nature* 409:529-533.
6. Sato T, Shimizu T, Watarai M, Kobayashi M, Kano S, Hamabata T, Takeda Y, Yamasaki S (2003) *Gene* 309:35-48.
7. Tobe T, Beatson SA, Taniguchi H, Abe H, Bauley CM, Fivian A, Younis R, Matthews S, Marches O, Frankel G, *et al.* (2006) *Proc Natl Acad Sci USA* 103:14941-14946.
8. Marches O, Ledger TN, Boury M, Ohara M, Tu X, Goffaux F, Mainil J, Rosenshine I, Sugai M, De Rycke J, *et al.* (2003) *Mol Microbiol* 50:1553-1567.
9. Pickett CL, Cottle DL, Pesci EC, Bikah G (1994) *Infect Immun* 62:1046-1051.
10. Huan PT, Whittle BL, Bastin DA, Lindberg AA, Verma NK (1997) *Gene* 195:207-216.
11. Allison GE, Angeles D, Tran-Dinh N, Verma NK (2002) *J Bacteriol* 184:1974-1987.
12. Welch RA, Burland V, Plunkett G 3rd, Redford P, Roesch P, Rasko DA, Buckles EL, Liou S-R, Boutin A, Hackett J, *et al.* (2002) *Proc Natl Acad Sci USA* 99:17020-17024.
13. McClelland M, Sanderson KE, Spieth J, Clifton SW, Latreille P, Courtney L, Porwollik S, Ali J, Dante M, Du F, *et al.* (2001) *Nature* 413:852-856.
14. Blattner FR, Plunkett G, Bloch CA, Perna NT, Burland V, Riley M, Collado-Vides J, Glasner JD, Rode CK, Mayhew GF, *et al.* (1997) *Science* 277:1453-1474.
