# Supplementary material
Source: PubMed Central journal article supplement (PMC1964815)
Supplement: pnas_0706695104_5.pdf [file pnas_0706695104_5.pdf]

**Table 5. PCR primers and conditions used in this study**

| Primer ID                        | Sequence (5'-3')                                                                   | Target           | PCR condition |            |             | Amplicon (bp)                                                  |
|----------------------------------|------------------------------------------------------------------------------------|------------------|---------------|------------|-------------|----------------------------------------------------------------|
|                                  |                                                                                    |                  | Denaturation  | Annealing  | Extention   |                                                                |
| Cdt-IB-u<br>Cdt-IB-d             | GATTTTGCCGGGTATTTCT<br>CCCTCAACAGAGGAAGAA                                          | Cdt-IB           | 94°C; 30 s    | 50°C; 30 s | 72°C; 1 m   | 707                                                            |
| P1<br>P2<br>B1<br>B2             | CCATTACTCACCTTGTAC<br>TGCTCTGAAAGTGACCG<br>GAGTCCGATATTCTCGG<br>TTCTTCAACGTGCGAACG | attP<br><br>attB | 94°C; 30 s    | 55°C; 30 s | 72°C; 1 m   | 1,108 (P1-P2)<br>534 (P1-B1)<br>1,305 (B1-B2)<br>1,878 (P2-B2) |
| OmpC-u<br>OmpC-d                 | GTGGATCCTTATTTGCCATTCCGC<br>GTGGATCCTGATCGCAACCAACAAAG                             | OmpC             | 94°C; 30 s    | 55°C; 30 s | 72°C; 1 m   | 15,02                                                          |
| cdt-I-phage-1<br>cdt-I-phage-2   | GGTGATGCTTATTACTGG<br>ATAGTGGATTTGCGCCGC                                           | Head and Tail    | 94°C; 30 s    | 52°C; 30 s | 72°C; 2.5 m | 5,775                                                          |
| cdt-I-phage-3<br>cdtI-phage-4    | AAAGCCATTCTGCAGGG<br>GCAGTAAGAAAATGCAGC                                            | Head and Tail    | 94°C; 30 s    | 52°C; 30 s | 72°C; 2.5 m | 5,260                                                          |
| cdt-I-phage-5<br>cdt-I-phage-6   | AAGAATTTAACC GCCAGC<br>GTTTTAACGTTCCGTC                                            | Head and Tail    | 94°C; 30 s    | 52°C; 30 s | 72°C; 2.5 m | 5,297                                                          |
| cdt-I-phage-7<br>cdt-I-phage-8   | GTATCTGGCATCGGTG<br>ACCACACACTGTATCTGC                                             | Head and Tail    | 94°C; 30 s    | 52°C; 30 s | 72°C; 2.5 m | 5,270                                                          |
| cdt-I-phage-9<br>cdt-I-phage-10  | GTTTTATCCTCTGTAAGGG<br>CAGCTCGTTAATGGAGAC                                          | Virulence        | 94°C; 30 s    | 52°C; 30 s | 72°C; 2.5 m | 5,026                                                          |
| cdt-I-phage-11<br>cdt-I-phage-12 | CTTGATATCGGAACTTACC<br>GAGACCAATGAGGGAATTG                                         | Integrase        | 94°C; 30 s    | 52°C; 30 s | 72°C; 1 m   | 862                                                            |
| cdt-I-phage-13<br>cdt-I-phage-14 | CCAAATATTTATCAAACGCC<br>CATCGATGACTTTACCCG                                         | Unknown          | 94°C; 30 s    | 52°C; 30 s | 72°C; 2.5 m | 4,996                                                          |
| cdt-I-phage-15<br>cdt-I-phage-16 | GTATCTCAAGGGTACATTG<br>ATGGAGAAAAGTAAACTGG                                         | Regulation       | 94°C; 30 s    | 52°C; 30 s | 72°C; 2.5 m | 7,492                                                          |
| cdt-I-phage-17<br>cdt-I-phage-18 | GGTAGTCTGGTATTTGGC<br>CATTGAAACGCCTTTCAGC                                          | Lysis            | 94°C; 30 s    | 52°C; 30 s | 72°C; 1 m   | 1,622                                                          |
