# Supplementary material
Source: PubMed Central journal article supplement (PMC1964815)

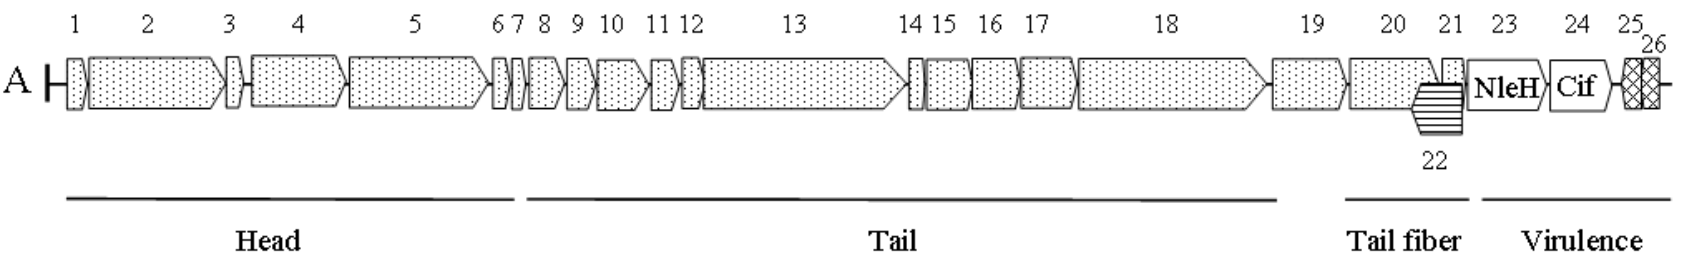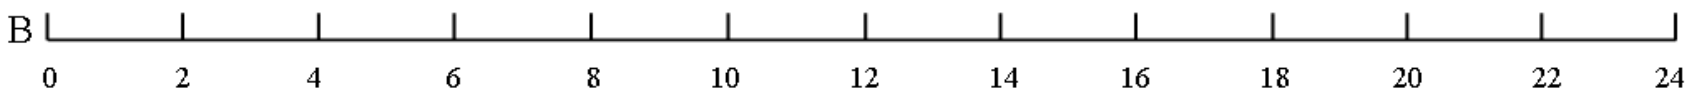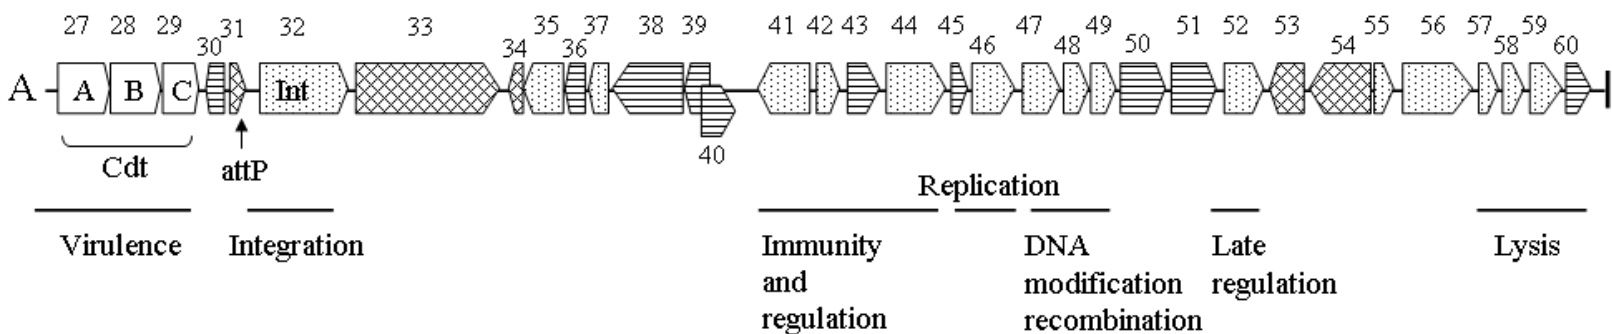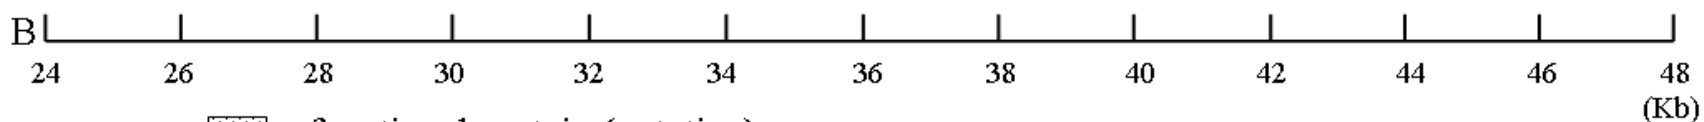

 : functional protein (putative)

 : hypothetical protein

 : virulence protein

 : unknown protein

Supplement: pnas_0706695104_1.pdf [file pnas_0706695104_1.pdf]

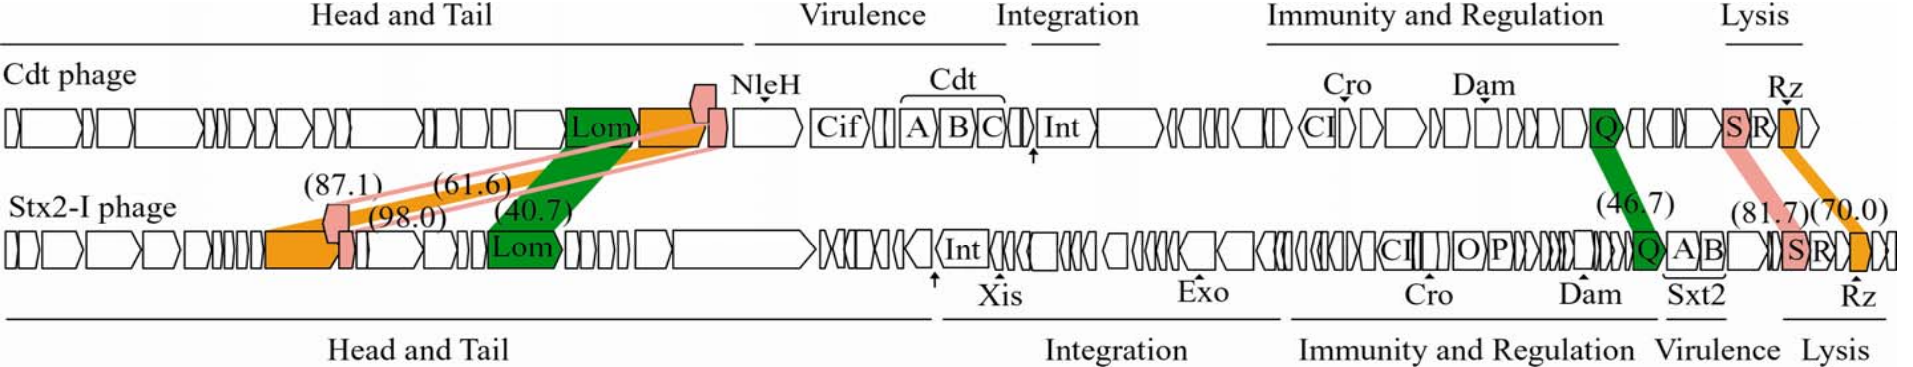

Supplement: pnas_0706695104_2.pdf [file pnas_0706695104_2.pdf]

**A. Head and Tail****B. Virulence****C. Integrase****D:Unknown****E: Regulation****G: Lysis**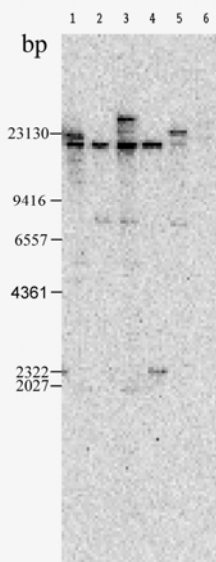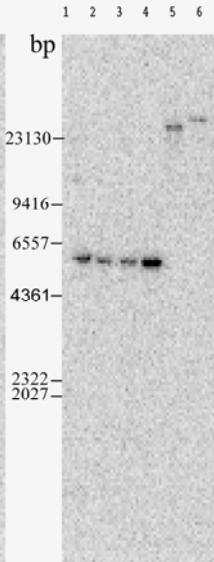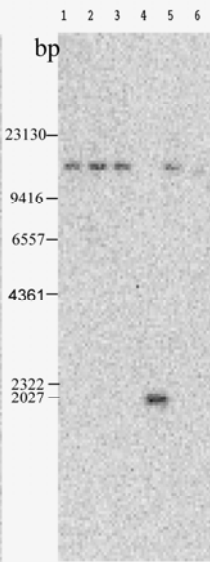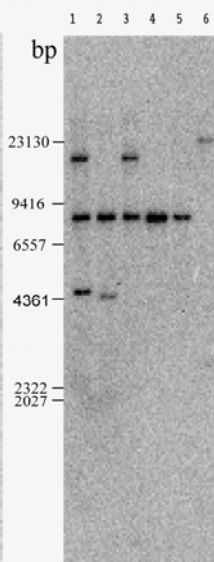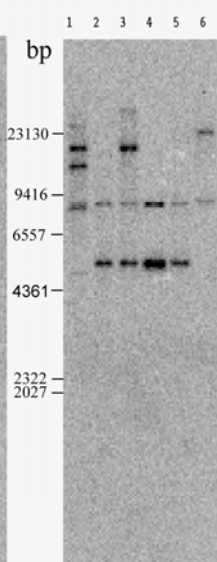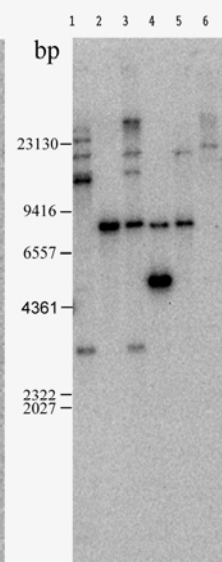

Supplement: pnas_0706695104_3.pdf [file pnas_0706695104_3.pdf]
